# Supplementary material for: Hyperbaric oxygen therapy for long COVID (HOT-LoCO), an interim safety report from a randomised controlled trial
Source: Springer Nature journal article supplement (doi:10.1186/s12879-023-08002-8), 2023-01-20
Supplement: MOESM1 [file 23942638]

Additional file 1  
 AE listing

| <b>MedDRA code</b> | <b>MedDRA PT</b>            | <b>MedDRA SOC</b>                                    | <b>Severity (CTCAE grade)</b> | <b>Relationship to IMP</b> |
|--------------------|-----------------------------|------------------------------------------------------|-------------------------------|----------------------------|
| 10014020           | Ear pain                    | Ear and labyrinth disorders                          | Grade 1 - Mild                | Unlikely                   |
| 10062352           | Respiratory tract infection | Respiratory, thoracic and mediastinal disorders      | Grade 1 - Mild                | Unlikely                   |
| 10003658           | Atrial fibrillation         | Cardiac disorders                                    | Grade 1 - Mild                | Unlikely                   |
| 10003988           | Back pain                   | Musculoskeletal and connective tissue disorders      | Grade 2 - Moderate            | Unlikely                   |
| 10008479           | Chest pain                  | General disorders and administration site conditions | Grade 2 - Moderate            | Possible                   |
| 10052137           | Ear discomfort              | Ear and labyrinth disorders                          | Grade 1 - Mild                | Unlikely                   |
| 10013968           | Dyspnoea                    | Respiratory, thoracic and mediastinal disorders      | Grade 2 - Moderate            | Unlikely                   |
| 10062352           | Respiratory tract infection | Respiratory, thoracic and mediastinal disorders      | Grade 1 - Mild                | Unlikely                   |
| 10040753           | Sinusitis                   | Infections and infestations                          | Grade 1 - Mild                | Unlikely                   |
| 10028411           | Myalgia                     | Musculoskeletal and connective tissue disorders      | Grade 1 - Mild                | Possible                   |
| 10011224           | Cough                       | Respiratory, thoracic and mediastinal disorders      | Grade 1 - Mild                | Possible                   |
| 10011224           | Cough                       | Respiratory, thoracic and mediastinal disorders      | Grade 2 - Moderate            | Probable                   |
| 10011224           | Cough                       | Respiratory, thoracic and mediastinal disorders      | Grade 1 - Mild                | Probable                   |
| 10011224           | Cough                       | Respiratory, thoracic and mediastinal disorders      | Grade 1 - Mild                | Possible                   |
| 10011224           | Cough                       | Respiratory, thoracic and mediastinal disorders      | Grade 1 - Mild                | Probable                   |
| 10011224           | Cough                       | Respiratory, thoracic and mediastinal disorders      | Grade 1 - Mild                | Probable                   |
| 10011224           | Cough                       | Respiratory, thoracic and mediastinal disorders      | Grade 1 - Mild                | Probable                   |
| 10011224           | Cough                       | Respiratory, thoracic and mediastinal disorders      | Grade 1 - Mild                | Probable                   |
| 10011224           | Cough                       | Respiratory, thoracic and mediastinal disorders      | Grade 1 - Mild                | Probable                   |
| 10011224           | Cough                       | Respiratory, thoracic and mediastinal disorders      | Grade 1 - Mild                | Probable                   |
| 10011224           | Cough                       | Respiratory, thoracic and mediastinal disorders      | Grade 1 - Mild                | Probable                   |
| 10047571           | Visual impairment           | Eye disorders                                        | Grade 2 - Moderate            | Probable                   |
| 10084268           | COVID-19                    | Infections and infestations                          | Grade 2 - Moderate            | Unlikely                   |
| 10011224           | Cough                       | Respiratory, thoracic and mediastinal disorders      | Grade 1 - Mild                | Possible                   |
| 10011224           | Cough                       | Respiratory, thoracic and mediastinal disorders      | Grade 1 - Mild                | Probable                   |
| 10011224           | Cough                       | Respiratory, thoracic and mediastinal disorders      | Grade 1 - Mild                | Probable                   |

|          |                             |                                                      |                |          |
|----------|-----------------------------|------------------------------------------------------|----------------|----------|
| 10011224 | Cough                       | Respiratory, thoracic and mediastinal disorders      | Grade 1 - Mild | Probable |
| 10011224 | Cough                       | Respiratory, thoracic and mediastinal disorders      | Grade 1 - Mild | Probable |
| 10062352 | Respiratory tract infection | Respiratory, thoracic, and mediastinal disorders     | Grade 1 - Mild | Unlikely |
| 10011224 | Cough                       | Respiratory, thoracic and mediastinal disorders      | Grade 1 - Mild | Probable |
| 10008469 | Chest discomfort            | General disorders and administration site conditions | Grade 1 - Mild | Probable |
| 10062352 | Respiratory tract infection | Respiratory, thoracic and mediastinal disorders      | Grade 1 - Mild | Unlikely |
